# Supplementary material
Source: HighWire-hosted journal article supplement (https://oem.bmj.com/content/78/10/769)
Supplement: inline-supplementary-material-2 [file inline-supplementary-material-2.pdf]

## Summary of Quality Assessment Scores

| <b>Objectives/Study Design</b>                |                                                                                               | <b>Average</b> | <b>SD</b> |
|-----------------------------------------------|-----------------------------------------------------------------------------------------------|----------------|-----------|
| 1                                             | Was the research question/study objective sufficiently described?                             | 1.85           | 0.36      |
| 2                                             | Study design appropriate to address the study question/objective?                             | 1.87           | 0.34      |
| <b>Study Population/Participant Selection</b> |                                                                                               |                |           |
| 3                                             | Data source and method of participant selection sufficiently described?                       | 1.87           | 0.34      |
| 4                                             | Study sample is an unbiased representation of the target population?                          | 1.48           | 0.54      |
| 5                                             | Coverage of the population in the data source reported and adequate?                          | 1.07           | 0.54      |
| 6                                             | Inclusion/exclusion criteria sufficiently described?                                          | 1.78           | 0.46      |
| <b>Case Definitions</b>                       |                                                                                               |                |           |
| 7                                             | "Work-related" clearly defined?                                                               | 1.35           | 0.83      |
| 8a                                            | "TBI" clearly defined?                                                                        | 0.83           | 0.86      |
| 8b                                            | Severity of TBI measured?                                                                     | 0.61           | 0.86      |
| 8c                                            | Definition of fatal cases clearly described?                                                  | 1.25           | 0.79      |
| <b>Measurements</b>                           |                                                                                               |                |           |
| 9                                             | Injury rates reported and denominator clearly defined?                                        | 1.85           | 0.36      |
| 10                                            | Variables defined and robust to measurement/ misclassification bias?                          | 0.87           | 0.58      |
| 11                                            | Missing data reported for main variables analyzed?                                            | 1.67           | 0.67      |
| <b>Analysis</b>                               |                                                                                               |                |           |
| 12                                            | Analysis sufficiently described/justified and appropriate?                                    | 1.81           | 0.39      |
| <b>Results/Discussion</b>                     |                                                                                               |                |           |
| 13                                            | Results reported and discussed in sufficient detail and interpreted appropriately/accurately? | 1.96           | 0.19      |
| 14                                            | Were study limitations stated?                                                                | 1.57           | 0.74      |
| 15                                            | Do the results support the conclusions?                                                       | 1.96           | 0.19      |
| <b>Overall</b>                                |                                                                                               |                |           |
| Total Score:                                  |                                                                                               | 23.39          | 4.56      |
| Maximum Score:                                |                                                                                               | 30.59          | 2.32      |
| Percentage:                                   |                                                                                               | 76%            | 13%       |
