# Supplementary material
Source: HighWire-hosted journal article supplement (https://oem.bmj.com/content/78/10/769)
Supplement: inline-supplementary-material-4 [file inline-supplementary-material-4.pdf]

**Supplemental Table 2: Studies exploring work-related injuries with a wrTBI subset (n=33)**

(Sample sizes are for entire study population unless otherwise specified)

| Author & Year,<br>Location [Period]                              | Design<br>[sample size]<br>(work-related injury)                    | Study Population                                              | Data source                                           | Case definition: TBI                                                                      | Case definition: work                                                          | % TBI<br>[Severity]                                                                                       | Quality<br>Assess. |
|------------------------------------------------------------------|---------------------------------------------------------------------|---------------------------------------------------------------|-------------------------------------------------------|-------------------------------------------------------------------------------------------|--------------------------------------------------------------------------------|-----------------------------------------------------------------------------------------------------------|--------------------|
| <b>Al-Abdallat et al. 2015</b><br>Amman, Jordan<br>[2008-2012]   | Descriptive cross-sectional study<br>[N=88]                         | Fatal occupational accidents in three Jordanian hospitals     | Hospital records of deaths                            | "Head Injury"<br>Severity: Fatal                                                          | "Occupational deaths resulting from accidents"                                 | 21.6%<br>[all fatal]                                                                                      | 17/28<br>(61%)     |
| <b>Amiri et al. 2016</b><br>Iran [2007-2011]                     | Descriptive, retrospective cohort study<br>[N=21,864]               | Work-related injuries in Insured construction workers         | Iranian Social Security Organization                  | "Body part affected: Cranium and brain"                                                   | "Insured workers"                                                              | 3.65%<br><i>*Calculated from table 3 based on sample size and 799 cranium and brain injuries reported</i> | 23/34<br>(68%)     |
| <b>Baragaba et al. 2016</b><br>Unites States<br>[2000-2011]      | Longitudinal cohort study<br>[N=1,638,856 (weighted)]               | Individuals reporting work-related injury on national survey  | Medical Expenditure Panel Survey                      | "Type of injury: Head"                                                                    | Self-reported: whether or not the injury occurred at work                      | 9.4% (weighted)                                                                                           | 20/32<br>(63%)     |
| <b>Barnetson and Foster 2015</b><br>Canada [2012]                | Descriptive secondary analysis of claims data<br>[N=246,342]        | Media reports vs Worker's compensation claims                 | Association of Workers' Compensation Boards of Canada | "Intracranial Injury"                                                                     | Workers' compensation time-loss injuries and fatalities claims data            | 2.1%<br>(as reported by worker's compensation claims)                                                     | 23/34<br>(68%)     |
| <b>Bunn et al. 2014</b><br>Kentucky, United States [2008-2012]   | Descriptive secondary analysis of surveillance data<br>[N=1,827]    | Kentucky trauma centres                                       | Kentucky Trauma Registry database                     | GCS: "Coma/severe brain injury"                                                           | Primary payer: Worker's compensation                                           | 7%                                                                                                        | 24/28<br>(86%)     |
| <b>Case et al. 2018</b><br>Alaska, United States [2000-2003]     | Descriptive secondary analysis of surveillance data<br>[N=117]      | Alaska's aviation industry                                    | Alaska Trauma Registry                                | ICD-9-CM<br>Severity: non-fatal injuries                                                  | "worker in the aviation industry" as recognized in the Alaskan Trauma Registry | 29% (n=8) of crash related injuries (n=28)<br>Not reported for non-crash injuries                         | 27/32<br>(84%)     |
| <b>Cryer et al. 2014</b><br>New Zealand<br>[2002-2004]           | Descriptive secondary analysis of claims data<br>[N=1,104]          | Accident Compensation Corporate compensated claims data       | Hospital discharge records and workers' compensation  | ICD-10 "traumatic brain injury with or without skull fracture"<br>Severity: ICD based ISS | Primary payer: Accident Compensation Corporation of New Zealand                | 24%                                                                                                       | 28/32<br>(88%)     |
| <b>da Silva and Pereira 2014</b><br>Bahia, Brazil<br>[2005-2007] | Descriptive cross-sectional study<br>[n=83, work typical accidents] | Private hospitals in the southwestern region of Bahia, Brazil | Unified Health System Hospital Information System     | ICD-10 codes for intracranial injury, designated as "Traumatic Brain Injury"              | "Work typical accidents"                                                       | 3.6%<br><i>*Reported as 3 cases, 4.9% of fall-related traumas</i>                                         | 23/34<br>(68%)     |
| <b>Dethleff et al. 2016</b><br>Germany<br>[2011-2013]            | Descriptive cross-sectional study<br>[n=19, traumatic injuries]     | Medical evacuations from offshore wind farm                   | Wind farm documents, Emergency protocols              | "Cerebral concussion"<br>Severity: GCS                                                    | Employed on the wind farm                                                      | 10.53%<br><i>*2 cerebral concussions out of 19 traumatic injuries</i>                                     | 16/28<br>(57%)     |

|                                                                         |                                                                              |                                                                                           |                                                              |                                                                              |                                                                                                                          |                                                                                    |                |
|-------------------------------------------------------------------------|------------------------------------------------------------------------------|-------------------------------------------------------------------------------------------|--------------------------------------------------------------|------------------------------------------------------------------------------|--------------------------------------------------------------------------------------------------------------------------|------------------------------------------------------------------------------------|----------------|
| <b>Fitch et al. 2015</b><br>Savar, Bangladesh<br>[2014]                 | Retrospective cohort study<br>[N=181]                                        | Center of Rehabilitation of the Paralyzed                                                 | Survey                                                       | "Concussion, internal injury"                                                | "Injured garment workers"                                                                                                | 21.6%                                                                              | 17/28<br>(61%) |
| <b>Green et al. 2019</b><br>Twin Cities, United States [2016-2017]      | Retrospective cohort study<br>[N=111]                                        | Janitors who were members of the Service Employees International Union                    | Survey                                                       | "Concussion"                                                                 | "Work-related injury was based on the National Center for Health Statistics and Bureau of Labor Statistics"              | 3.60%                                                                              | 20/28<br>(71%) |
| <b>Gupta et al. 2017</b><br>Jhansi, India<br>[2015-2016]                | Cross-sectional study<br>[N=309]                                             | Railway wagon repair workshop urban area                                                  | Semi-structured questionnaire administered by an interviewer | "Crushing head injury"                                                       | Self-reported: Injuries occurring inside the working environment of the workshop                                         | 0.97%                                                                              | 17/28<br>(61%) |
| <b>Hekimoglu et al. 2015</b><br>Van, Turkey<br>[2010-2012]              | Retrospective hospital document review<br>[N=245]                            | Occupational accidents reported to 2 hospitals in Van both before and after an earthquake | Hospital documents                                           | "Head trauma"                                                                | "Injuries due to occupational accidents"                                                                                 | Pre-earthquake period: 2.4%<br>Post-earthquake period: 4.9%                        | 16/30<br>(53%) |
| <b>Herttua et al. 2019</b><br>Denmark<br>[2004-2014]                    | Retrospective cohort study<br>[N=1,401]                                      | Merchant ships                                                                            | Contacts from ships to Telemedical Assistance Service        | ICD-10 diagnoses: injuries to the head (S00-S09)                             | Employed on merchant ships                                                                                               | 13%                                                                                | 24/28<br>(86%) |
| <b>Holloway-Beth et al. 2016</b><br>Illinois, United States [1980-2008] | Descriptive secondary analysis of claims data<br>[N=18,892]                  | Law enforcement personnel injured on the job                                              | Illinois Workers' Compensation Commission                    | "Body part affected: Head"                                                   | Workers' Compensation Commission claims, when disputes re: compensation are not resolved directly with employer          | 5.62%<br><i>*Calculated from table 3</i>                                           | 26/32<br>(81%) |
| <b>Kim et al. 2016</b><br>Korea [2010-2012]                             | Case-control study<br>[N=1,298]                                              | 10 emergency departments                                                                  | ED-based Occupational Injury Surveillance                    | ICD-10 codes: "Head injury (S06.0–S06.9); Intracranial injury (S06.1–S06.9)" | Emergency Department-based Occupational Injury Surveillance database reports of injuries from falls related to paid work | 13.4% head injury, 6.9% intracranial injury [10.1% of intracranial injuries fatal] | 26/30<br>(87%) |
| <b>Maguire and O'Neill 2017</b><br>United States<br>[2012-2015]         | Retrospective cohort study<br>[N=1,630]                                      | Emergency medical services workers                                                        | Bureau of Labor Statistics                                   | "Body part injured: Head"                                                    | Bureau of Labor Statistics                                                                                               | 11.66%<br><i>*Reported in text as 190 head injuries</i>                            | 22/32<br>(69%) |
| <b>Maxwell and Wozny 2015</b><br>United States<br>[2005-2010]           | Exploratory secondary analysis of surveillance data<br>[N=800,791]           | Work-related injuries in federal employees                                                | Federal Employees' Compensation Act and FedScope             | "Area of injury: Head, internal"                                             | Federal Employees' Compensation Act workplace injury and illness claims                                                  | 6.17%                                                                              | 26/32<br>(81%) |
| <b>§ McIntosh et al. 2016</b><br>Australia [2000-2013]                  | Retrospective case series<br>[n=53, work-related subset of study population] | Quad bike fatalities                                                                      | National Coronial Information System                         | AIS: 'Specific injury pathology: Traumatic brain injury'                     | "Work activity"                                                                                                          | 20.80%<br>[all fatal]<br><i>*Reported in supplemental table A9</i>                 | 22/32<br>(69%) |

|                                                                                                  |                                                                              |                                                                                  |                                                                     |                                                                                                                           |                                                                                         |                                                                                                                         |                |
|--------------------------------------------------------------------------------------------------|------------------------------------------------------------------------------|----------------------------------------------------------------------------------|---------------------------------------------------------------------|---------------------------------------------------------------------------------------------------------------------------|-----------------------------------------------------------------------------------------|-------------------------------------------------------------------------------------------------------------------------|----------------|
| <b>§ Mollayeva et al. 2016</b><br>Ontario, Canada [2004]                                         | Cross-sectional study<br>[Total work-related injuries N=74,332]              | WSIB insured workers with lost time claims                                       | Workplace Safety and Insurance Board                                | Diagnosis of 'concussion', 'closed head injury', 'contusion', or 'head injury with sequelae consistent with brain injury' | WSIB lost-time claims                                                                   | 1.35%                                                                                                                   | 23/32<br>(72%) |
| <b>Mroz et al. 2014</b><br>Maryland, United States [1998-2008]                                   | Descriptive secondary analysis of claims data<br>[N=232,072]                 | Workers insured by IWIF                                                          | Injured Workers' Insurance Fund (IWIF) claims database              | "Injury type: head"                                                                                                       | Workers' compensation claims                                                            | 2.75%<br><i>*Calculated from 6,386 reported head injuries</i>                                                           | 25/32<br>(78%) |
| <b>§ Nosaka et al. 2015</b><br>Okayama, Japan [2012-2014]<br><i>*excluded from meta analysis</i> | Retrospective cohort study<br>[n=3, work-related subset of study population] | Okayama University Hospital                                                      | Clinical records related to hospitalizations due to falls           | AIS: H= head<br>Severity: ISS                                                                                             | "Working settings: Occupational"                                                        | 66.67%,<br>[50% fatal]<br><i>*Calculated from table 1 based on 2 reported fatalities</i>                                | 27/30<br>(90%) |
| <b>O'Connor et al 2017</b><br>Ireland [2011-2015]                                                | Descriptive epidemiology study<br>[N=944]                                    | Horse race meetings                                                              | Race meeting injury report forms related to falls                   | "Concussion",<br>"Structural brain injury"                                                                                | Licensed professional jockeys                                                           | 6.78%<br><i>*Calculated from table 3 based on sample size and 64 concussions and structural brain injuries reported</i> | 26/32<br>(81%) |
| <b>Onder and Mutlu 2017</b><br>Soma, Turkey [2006-2011]                                          | Retrospective cohort study<br>[N=231]                                        | Opencast coal mines of the Aegean Lignite Enterprise of Turkish Coal Enterprises | ELI lignite coal mine accident records                              | "Part of body: Head"                                                                                                      | "All accidents at work in which the person is unfit for work for more than 3 full days" | 16.45%                                                                                                                  | 18/28<br>(64%) |
| <b>Ozer et al. 2014</b><br>Zonguldak, Turkey [2005-2008]                                         | Retrospective autopsy report review<br>[N=42]                                | Coal mines                                                                       | Autopsy reports                                                     | "Cerebral damage secondary to blunt head trauma"<br>Severity: Fatal                                                       | Employed in Zonguldak coal mines                                                        | 26.2%<br>[all fatal]                                                                                                    | 19/32<br>(59%) |
| <b>Rorat et al. 2015</b><br>Wroclaw, Poland [1991-2011]                                          | Retrospective autopsy report review<br>[N=120]                               | Farm-related fatalities                                                          | Medico-legal autopsy reports by the Department of Forensic Medicine | "Isolated lethal cranio-cerebral injuries"                                                                                | "Activity related to (work on the farm) agriculture."                                   | 14.17%<br>[all fatal]<br><i>*Reported as 17 lethal cranio-cerebral injuries</i>                                         | 16/28<br>(57%) |
| <b>Sears et al. 2014</b><br>Washington, United States [1998-2008]                                | Retrospective cohort study<br>[N=4,700]                                      | Insured workers in Washington state                                              | Washington State Trauma Registry & worker's compensation claims     | ICD-9-CM code of 800.0-801.9, 803.0-804.9, 850.0-854.1, 950.1-950.3, or 959.01.<br>Severity: ISS                          | Workers' compensation claims                                                            | 19.83%<br>[1% fatal]<br><i>*Reported as 932 TBI, 9 fatal</i>                                                            | 33/34<br>(97%) |

|                                                                   |                                                                                          |                                                                                        |                                                                                                          |                                                        |                                                                                                                                           |                                                                                                   |                |
|-------------------------------------------------------------------|------------------------------------------------------------------------------------------|----------------------------------------------------------------------------------------|----------------------------------------------------------------------------------------------------------|--------------------------------------------------------|-------------------------------------------------------------------------------------------------------------------------------------------|---------------------------------------------------------------------------------------------------|----------------|
| <b>Swanberg et al. 2016</b><br>United States<br>[2013-2014]       | Cross-sectional study<br>[n=97, participants<br>reporting an injury in<br>the past year] | Workers currently<br>employed at a<br>thoroughbred farm                                | Questionnaire                                                                                            | "Injury site: head"                                    | Self-reported: "Thinking about<br>your current job on the horse<br>farm, in the past 12 months<br>have you had a work-related<br>injury?" | 7.22%<br><i>*Calculated based on<br/>sample size and 7<br/>reported head injuries</i>             | 20/28<br>(71%) |
| <b>Syron et al. 2018</b><br>Alaska, United States<br>[2010-2015]  | Cross-sectional study<br>[N=304]                                                         | Commercial fishing<br>industry vessels                                                 | Commercial Fishing<br>Safety Research and<br>Design Program<br>surveillance data, Coast<br>Guard reports | OIICS: "Nature of injury:<br>intracranial injury"      | Traumatic injuries among<br>seafood processors that were<br>reported to the US Coast<br>Guard                                             | 5.26%                                                                                             | 30/34<br>(88%) |
| <b>Tsioras et al. 2014</b><br>Austria, [2000-2009]                | Cross-sectional study<br>[N=1,077]                                                       | ÖBf wood-cutting<br>activities                                                         | ÖBf registries                                                                                           | "Type of injury:<br>Concussion"                        | ÖBf employed fulltime forest<br>workers                                                                                                   | 1.2%                                                                                              | 13/30<br>(43%) |
| <b>van Leeuwen and<br/>Harte 2017</b><br>Netherlands [2011]       | Retrospective cohort<br>study<br>[N=1,294]                                               | Dutch mental health<br>professionals working in<br>inpatient psychiatric<br>facilities | Online questionnaire                                                                                     | "Concussion"                                           | Working in inpatient<br>psychiatric facilities                                                                                            | 1.62%<br><i>*Calculated from table 3<br/>based on sample size and<br/>21 reported concussions</i> | 20/28<br>(71%) |
| <b>Witt et al. 2018</b><br>Kentucky, United<br>States [2005-2015] | Descriptive secondary<br>analysis of claims data<br>[N=4,377]                            | Kentucky Department of<br>Workers' Claims                                              | WC first reports of<br>injury data                                                                       | "Nature of injury:<br>Concussion"                      | Workers' compensation<br>claims                                                                                                           | 1%                                                                                                | 25/32<br>(78%) |
| <b>Yadav 2019</b><br>Dadra and Nagar<br>Haveli, India [2017]      | Capture-recapture<br>epidemiological study<br>[N=113]                                    | Dadra and Nagar Haveli<br>territory                                                    | Police First Information<br>Reports, government<br>health facility records                               | ICD-10 (otherwise<br>unspecified)<br>"Body part: Head" | "Accident in industrial unit"                                                                                                             | 7.08%                                                                                             | 20/32<br>(63%) |

**Acronyms:** AIS - Abbreviated Injury Score, ED - Emergency Department, GCS - Glasgow Coma Scale, ICD - International Classification of Diseases (versions 9 or 10), ISS - Injury Severity Scale, mTBI - mild traumatic brain injury, OIICS - Occupational Injury and Illness Classification System, TOOCS - Type of Occurrence Classification System, WC - Workers' Compensation, WSIB - Workplace Safety and Insurance Board (Ontario)

§ indicates studies in multiple summary tables
