# Supplementary material
Source: HighWire-hosted journal article supplement (https://oem.bmj.com/content/78/10/769)

**Supplemental file 3: Forest plots of meta analyses**

Figure 1 – Pooled proportion wrTBI population that is male

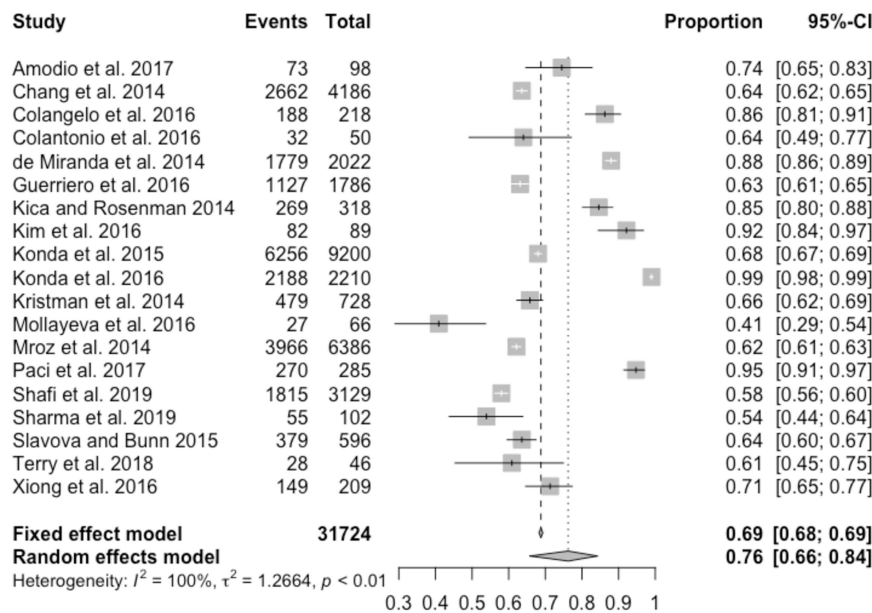

Figure 2 – Pooled mean age in wrTBI population

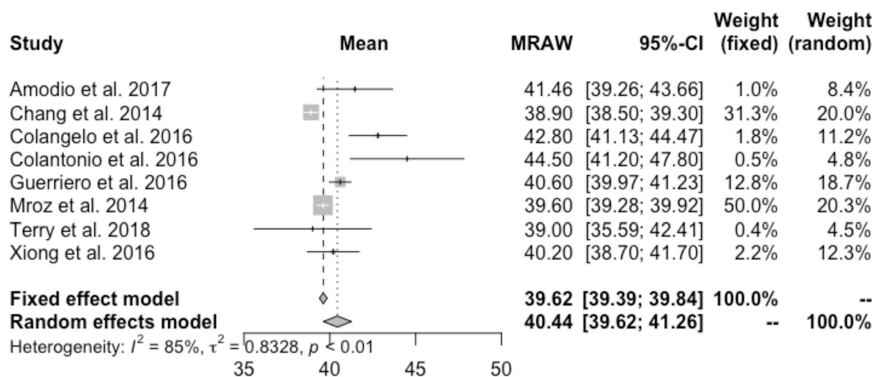

Figure 3 – Pooled proportion of wrTBI among work-related injuries

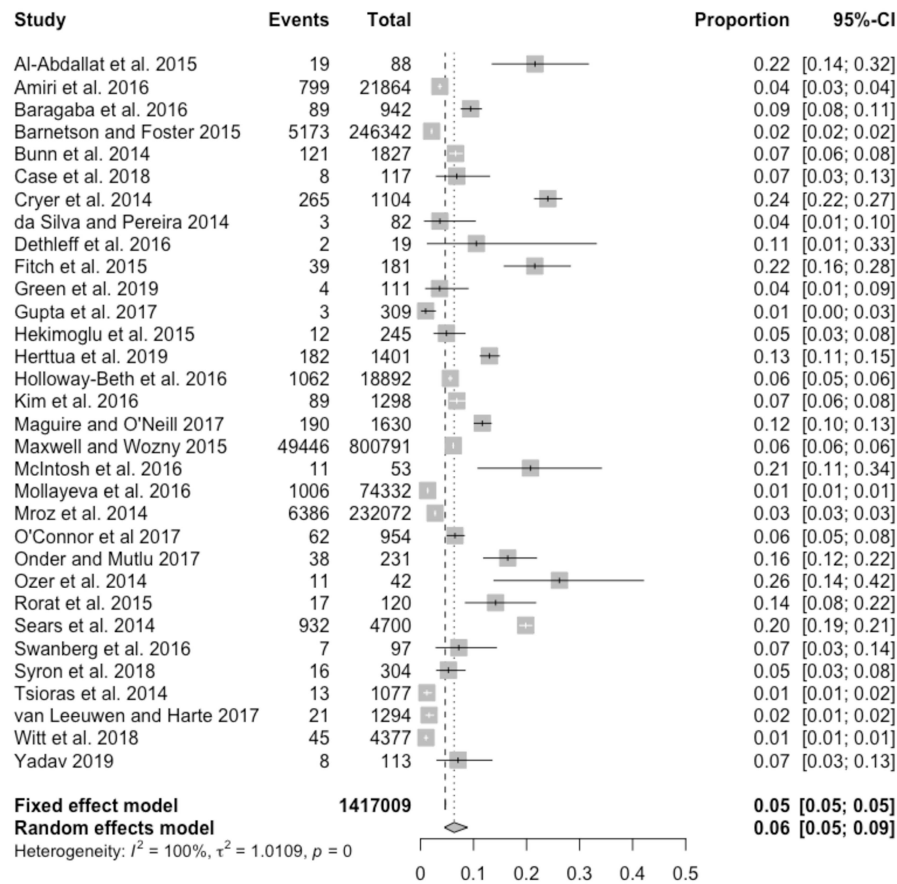

Figure 4 – Pooled proportion of wrTBI among TBI

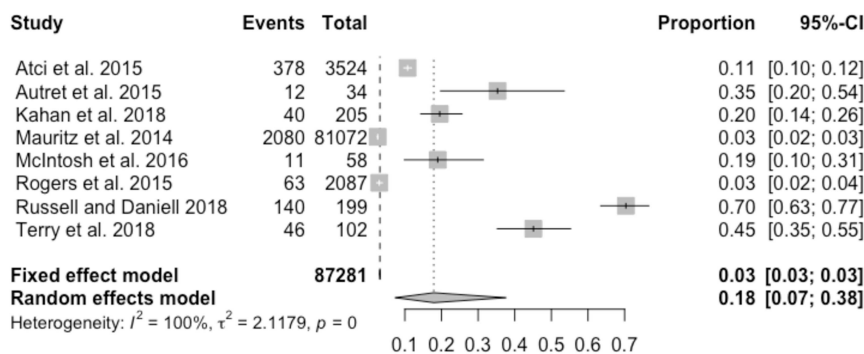

Figure 5 – Pooled proportion of wrTBI resulting in death

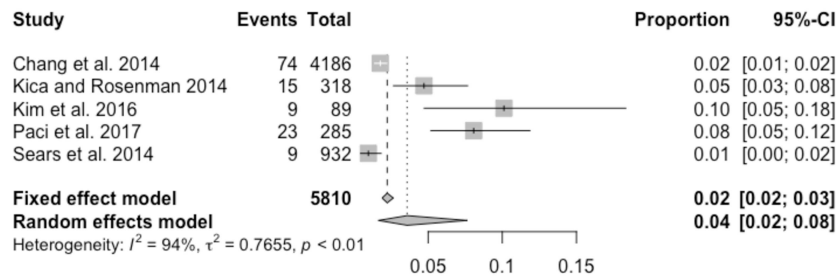

Supplement: inline-supplementary-material-6 [file inline-supplementary-material-6.pdf]
